# Supplementary material for: Helquats, helical extended diquats, as fast electron transfer systems
Source: Royal Society of Chemistry journal article supplement (doi:10.1039/b915148f), 2010-01-01
Supplement: b915148f.pdf [file b915148f.pdf]

## Supplements

### Content:

1. **Redox potentials**
2. **The frequency dependence of the electrode admittance**
3. **The concentration dependence of the adsorption contribution**
4. **SCF calculations, compound 1**
5. **SCF calculations, compound 2**
6. **SCF calculations, compound 4**
7. **SCF calculations, compound 5**

1. Redox potentials of compounds 1 to 5

All values are referred to the ferrocene/ferricinium redox couple

| Compound | 1 <sup>th</sup> redox potl. | 2 <sup>nd</sup> redox potl. |
|----------|-----------------------------|-----------------------------|
| <b>1</b> | -1.248                      | -1.488                      |
| <b>2</b> | -1.272                      | -1.528                      |
| <b>3</b> | -1.277                      | -1.516                      |
| <b>4</b> | -1.303                      | -1.524                      |
| <b>5</b> | -1.317                      | -1.587                      |

2. The frequency dependence of the electrode admittance of the blank and in the presence of 1 mM **1**. Solvent was acetonitrile, the indifferent electrolyte was 0.1 M TBA PF<sub>6</sub>. Circles show the absence of the frequency dispersion of the electrode

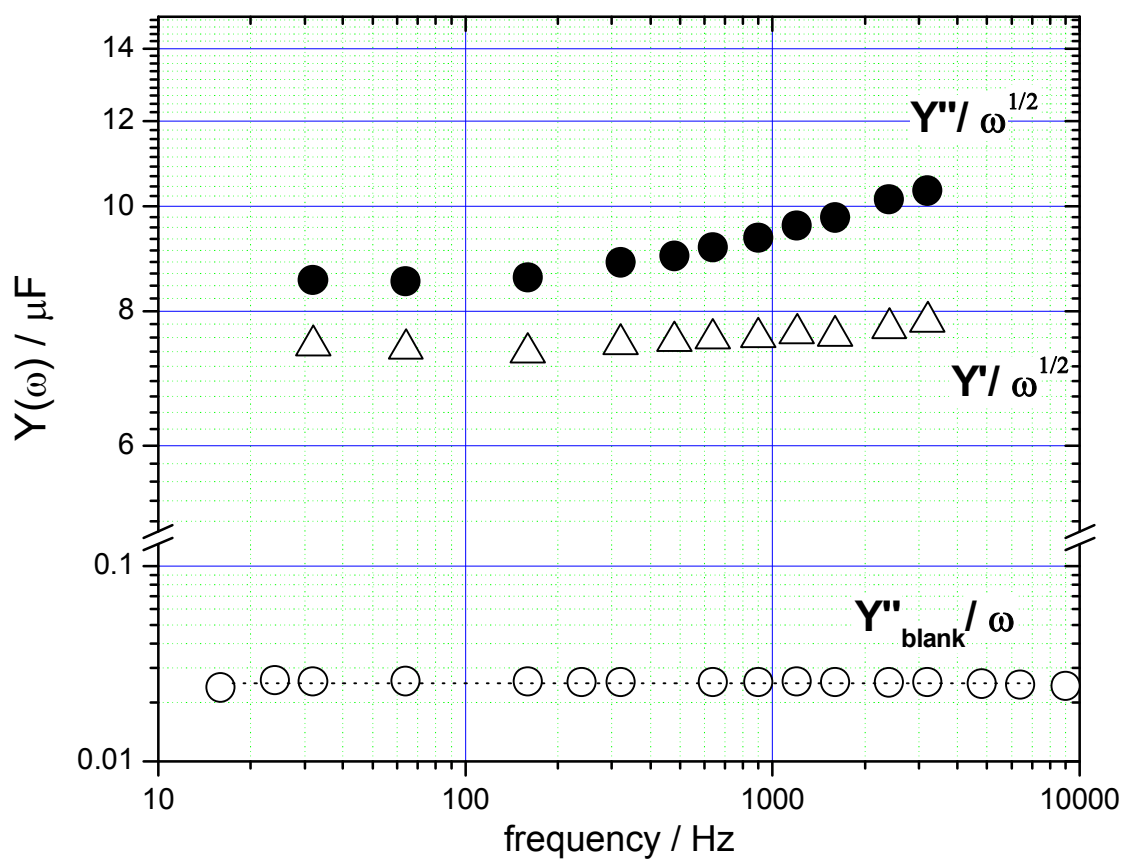

3. The concentration dependence of the adsorption contribution to the electrode admittance evaluated as the difference of the imaginary and real admittance components at the frequency of AC signal 160 Hz.

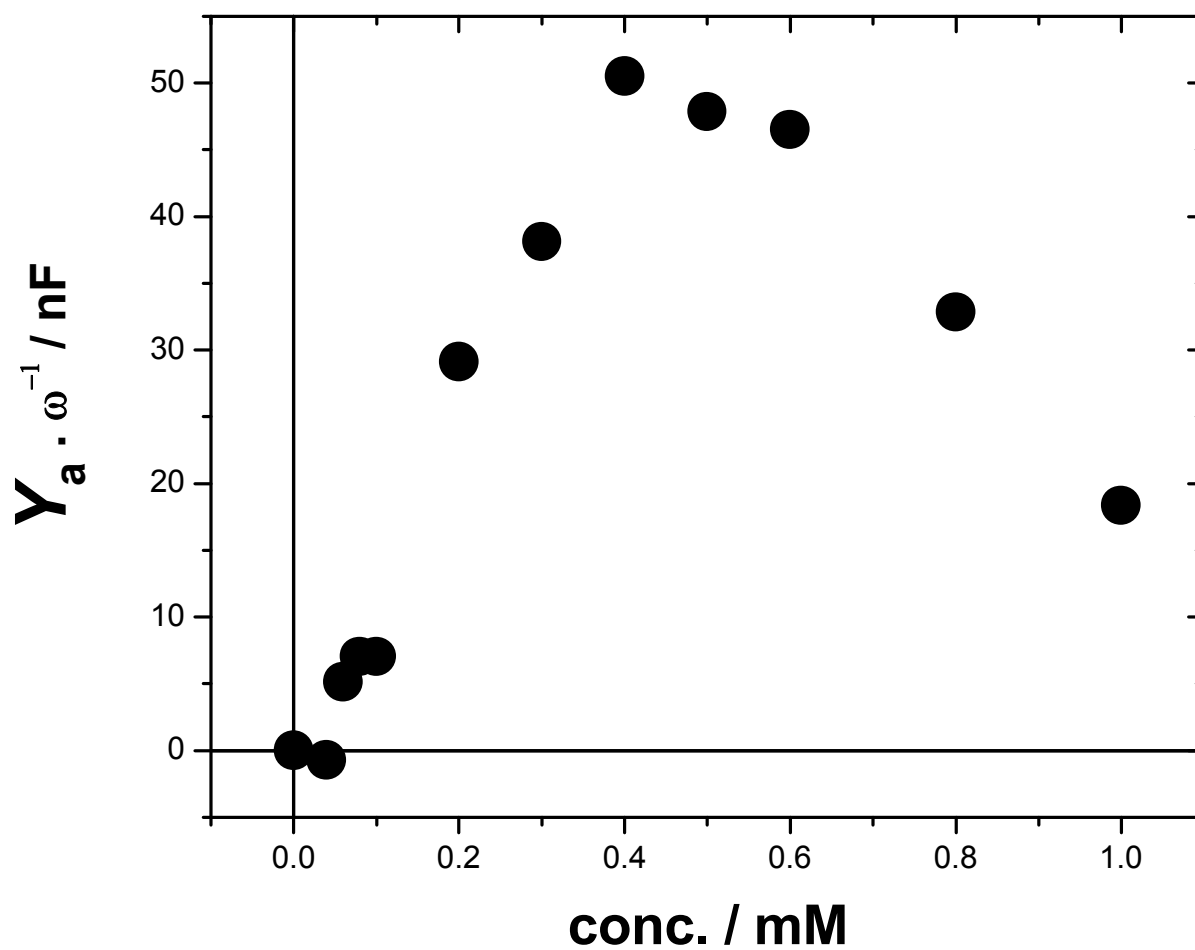

#### 4. SCF calculations, compound 1

```
+-----+
| Jaguar version 3.5, release 42                                     |
|                                                                 |
| Copyright 1991-1998 Schrodinger, Inc.                             |
| All Rights Reserved.                                             |
|                                                                 |
| Use of this program should be acknowledged in publications as:  |
| Jaguar 3.5, Schrodinger, Inc., Portland, Oregon, 1998.         |
+-----+
```

start of program pre  
Job name: WF16338  
Executables used: C:\PROGRA~1\WAVEFU~1\TITAN  
Temporary files : C:\DOCUME~1\ADMINI~1\LOCALS~1\Temp\WF16338

Input file comments:  
Molecule001  
This file created by Spartan

basis set: 6-31g\*  
net molecular charge: 1  
multiplicity: 2

number of basis functions.... 366

#### Input geometry:

|      | angstroms     |               |               |
|------|---------------|---------------|---------------|
| atom | x             | y             | z             |
| H1   | 4.7248340000  | 0.1865370000  | -1.3549970000 |
| C1   | 3.7207930000  | -0.2279830000 | -1.4028310000 |
| C2   | 1.1844900000  | -1.2690890000 | -1.4270260000 |
| N2   | 2.8628370000  | 0.0719610000  | -0.3964410000 |
| C4   | 3.3376590000  | -1.0510710000 | -2.4509030000 |
| C5   | 2.0639500000  | -1.5922590000 | -2.4551130000 |
| C6   | 1.5697610000  | -0.3786130000 | -0.4081170000 |
| H3   | 4.0407860000  | -1.2929660000 | -3.2462420000 |
| H4   | 1.7635820000  | -2.2751430000 | -3.2506980000 |
| H6   | 0.2066400000  | -1.7444140000 | -1.4240300000 |
| C3   | 3.3765830000  | 0.8691880000  | 0.7469840000  |
| H7   | 3.0274740000  | 1.8970450000  | 0.5930840000  |
| H8   | 4.4710440000  | 0.8564980000  | 0.7330540000  |
| C7   | 2.8632970000  | 0.2508320000  | 2.0370230000  |
| H11  | 3.2137580000  | 0.8493020000  | 2.8859730000  |
| H12  | 3.2372100000  | -0.7726250000 | 2.1576010000  |
| C9   | 0.7015310000  | 0.0175940000  | 0.7385070000  |
| C10  | -0.7265630000 | 0.1445230000  | 0.6993330000  |

|     |               |               |               |
|-----|---------------|---------------|---------------|
| C8  | 1.3546200000  | 0.2173590000  | 1.9871420000  |
| C11 | -1.4229540000 | 0.2251890000  | 1.9379030000  |
| H2  | -1.2928010000 | 0.4363990000  | 4.0957660000  |
| C12 | -0.7469310000 | 0.3448080000  | 3.1559640000  |
| C13 | 0.6366700000  | 0.3692670000  | 3.1772940000  |
| H16 | 1.1495560000  | 0.4912930000  | 4.1320970000  |
| C14 | -2.9325730000 | 0.1978140000  | 1.9420960000  |
| H9  | -3.3064400000 | 1.2209750000  | 1.8188990000  |
| H10 | -3.3143240000 | -0.1980150000 | 2.8904050000  |
| C15 | -3.4036060000 | -0.6941780000 | 0.8052120000  |
| H13 | -4.4968850000 | -0.6891490000 | 0.7511960000  |
| H17 | -3.0534000000 | -1.7291430000 | 0.8960700000  |
| C16 | -1.5533260000 | 0.2721790000  | -0.5358660000 |
| N1  | -2.8477760000 | -0.1694980000 | -0.4686370000 |
| C18 | -3.6694640000 | -0.1044330000 | -1.5454240000 |
| H18 | -4.6761550000 | -0.5017920000 | -1.4410580000 |
| C19 | -3.2473450000 | 0.4661780000  | -2.7366170000 |
| H20 | -3.9217770000 | 0.5222320000  | -3.5895320000 |
| C20 | -1.1298130000 | 0.9149860000  | -1.7135720000 |
| H21 | -0.1508090000 | 1.3828380000  | -1.7828510000 |
| C21 | -1.9721570000 | 0.9977810000  | -2.8174080000 |
| H22 | -1.6419760000 | 1.4875910000  | -3.7342370000 |

Molecular weight: 286.15 amu

Stoichiometry: C20N2H18

Molecular Point Group: C2

Point Group used: C1 (symmetry turned off)

nuclear repulsion energy..... 1732.295717814 hartrees

Non-default options chosen:

SCF calculation type: RODFT

RODFT=Becke\_3\_Parameter/HF+Slater+Becke88+VWN+LYP (B3LYP)

Molecular symmetry not used

end of program pre

start of program onee

smallest eigenvalue of S: 2.816E-04

number of canonical orbitals..... 365

end of program onee

start of program hfig

initial wavefunction generated automatically from atomic wavefunctions

| Irreducible representation | Total no orbitals | No of occupied orbitals |         |     |
|----------------------------|-------------------|-------------------------|---------|-----|
| No Symm                    | 365               | Shell_1                 | Shell_2 | ... |
| -----                      |                   | 75                      | 1       |     |

Orbital occupation/shell      1.000      0.500

end of program hfig

start of program probe

end of program probe

start of program grid

number of gridpoints:

| atom     | H1   | C1   | C2   | N2   | C4   | C5   | C6   | H3   |
|----------|------|------|------|------|------|------|------|------|
| grid # 1 | 72   | 85   | 86   | 97   | 89   | 89   | 86   | 73   |
| grid # 2 | 114  | 94   | 96   | 104  | 97   | 96   | 95   | 118  |
| grid # 3 | 216  | 178  | 183  | 215  | 183  | 183  | 189  | 224  |
| grid # 4 | 223  | 314  | 328  | 382  | 331  | 329  | 328  | 232  |
| grid # 5 | 4304 | 4304 | 4304 | 4304 | 4304 | 4304 | 4304 | 4304 |
| grid # 6 | 1192 | 1192 | 1192 | 1192 | 1192 | 1192 | 1192 | 1192 |
| grid # 7 | 5226 | 5226 | 5226 | 5226 | 5226 | 5226 | 5226 | 5226 |

number of gridpoints:

| atom     | H4   | H6   | C3   | H7   | H8   | C7   | H11  | H12  |
|----------|------|------|------|------|------|------|------|------|
| grid # 1 | 73   | 71   | 83   | 70   | 68   | 84   | 69   | 70   |
| grid # 2 | 118  | 115  | 91   | 111  | 107  | 92   | 110  | 112  |
| grid # 3 | 222  | 218  | 166  | 220  | 214  | 164  | 215  | 222  |
| grid # 4 | 231  | 222  | 290  | 226  | 219  | 298  | 220  | 226  |
| grid # 5 | 4304 | 4304 | 4304 | 4304 | 4304 | 4304 | 4304 | 4304 |
| grid # 6 | 1192 | 1192 | 1192 | 1192 | 1192 | 1192 | 1192 | 1192 |
| grid # 7 | 5226 | 5226 | 5226 | 5226 | 5226 | 5226 | 5226 | 5226 |

number of gridpoints:

| atom     | C9   | C10  | C8   | C11  | H2   | C12  | C13  | H16  |
|----------|------|------|------|------|------|------|------|------|
| grid # 1 | 93   | 93   | 88   | 88   | 72   | 89   | 89   | 72   |
| grid # 2 | 101  | 101  | 98   | 98   | 116  | 97   | 97   | 116  |
| grid # 3 | 198  | 198  | 195  | 195  | 217  | 186  | 186  | 217  |
| grid # 4 | 346  | 346  | 341  | 341  | 225  | 329  | 329  | 225  |
| grid # 5 | 4304 | 4304 | 4304 | 4304 | 4304 | 4304 | 4304 | 4304 |
| grid # 6 | 1192 | 1192 | 1192 | 1192 | 1192 | 1192 | 1192 | 1192 |
| grid # 7 | 5226 | 5226 | 5226 | 5226 | 5226 | 5226 | 5226 | 5226 |

number of gridpoints:

| atom | C14 | H9 | H10 | C15 | H13 | H17 | C16 | N1 |
|------|-----|----|-----|-----|-----|-----|-----|----|
|------|-----|----|-----|-----|-----|-----|-----|----|

|          |      |      |      |      |      |      |      |      |
|----------|------|------|------|------|------|------|------|------|
| grid # 1 | 84   | 70   | 69   | 83   | 68   | 70   | 86   | 97   |
| grid # 2 | 92   | 112  | 110  | 91   | 107  | 111  | 95   | 104  |
| grid # 3 | 164  | 222  | 215  | 166  | 214  | 220  | 189  | 215  |
| grid # 4 | 298  | 226  | 220  | 290  | 219  | 226  | 328  | 382  |
| grid # 5 | 4304 | 4304 | 4304 | 4304 | 4304 | 4304 | 4304 | 4304 |
| grid # 6 | 1192 | 1192 | 1192 | 1192 | 1192 | 1192 | 1192 | 1192 |
| grid # 7 | 5226 | 5226 | 5226 | 5226 | 5226 | 5226 | 5226 | 5226 |

number of gridpoints:

| atom     | C18  | H18  | C19  | H20  | C20  | H21  | C21  | H22  |
|----------|------|------|------|------|------|------|------|------|
| grid # 1 | 85   | 72   | 89   | 73   | 86   | 71   | 89   | 73   |
| grid # 2 | 94   | 114  | 97   | 118  | 96   | 115  | 96   | 118  |
| grid # 3 | 178  | 216  | 183  | 224  | 183  | 218  | 183  | 222  |
| grid # 4 | 314  | 223  | 331  | 232  | 328  | 222  | 329  | 231  |
| grid # 5 | 4304 | 4304 | 4304 | 4304 | 4304 | 4304 | 4304 | 4304 |
| grid # 6 | 1192 | 1192 | 1192 | 1192 | 1192 | 1192 | 1192 | 1192 |
| grid # 7 | 5226 | 5226 | 5226 | 5226 | 5226 | 5226 | 5226 | 5226 |

number of gridpoints:

| atom     | total  |
|----------|--------|
| grid # 1 | 3214   |
| grid # 2 | 4164   |
| grid # 3 | 8016   |
| grid # 4 | 11280  |
| grid # 5 | 172160 |
| grid # 6 | 47680  |
| grid # 7 | 209040 |

end of program grid

start of program rwr

end of program rwr

start of program scf

|                               |     |
|-------------------------------|-----|
| number of electrons.....      | 151 |
| number of alpha electrons.... | 76  |
| number of beta electrons..... | 75  |
| number of orbitals, total.... | 365 |
| number of core orbitals.....  | 75  |
| number of open shell orbs.... | 1   |
| number of occupied orbitals.. | 76  |
| number of virtual orbitals... | 289 |
| number of hamiltonians.....   | 2   |
| number of shells.....         | 2   |

SCF type: RODFT=Becke\_3\_Parameter/HF+Slater+Becke88+VWN+LYP (B3LYP)



|      | i | u | d | i | g |                  | RMS      | maximum |
|------|---|---|---|---|---|------------------|----------|---------|
|      | t | p | i | c | r |                  | energy   | DIIS    |
|      | e | d | i | u | i | total energy     | density  | error   |
|      | r | t | s | t | d | change           | change   |         |
| etot | 1 | N | N | 5 | M | -879.06178045630 | 3.8E-03  | 1.2E-01 |
| etot | 2 | Y | Y | 6 | M | -881.65545644013 | 2.6E+00  | 7.2E-02 |
| etot | 3 | Y | Y | 6 | M | -881.77931148404 | 1.2E-01  | 5.6E-02 |
| etot | 4 | N | Y | 2 | U | -882.20221950614 | 4.2E-01  | 1.7E-02 |
| etot | 5 | Y | Y | 6 | M | -882.23815585619 | 3.6E-02  | 8.6E-03 |
| etot | 6 | N | Y | 2 | U | -882.24314750293 | 5.0E-03  | 6.3E-03 |
| etot | 7 | Y | Y | 6 | M | -882.24786725622 | 4.7E-03  | 1.3E-03 |
| etot | 8 | Y | Y | 6 | M | -882.24811014201 | 2.4E-04  | 4.9E-04 |
| etot | 9 | N | N | 2 | U | -882.24807376991 | -3.6E-05 | 0.0E+00 |

Energy components, in hartrees:

|     |                               |                   |       |
|-----|-------------------------------|-------------------|-------|
| (A) | Nuclear repulsion.....        | 1732.29571781447  |       |
| (E) | Total one-electron terms..... | -4614.25315638775 |       |
| (I) | Total two-electron terms..... | 1999.70936480337  |       |
| (L) | Electronic energy.....        | -2614.54379158438 | (E+I) |
| (N) | Total energy.....             | -882.24807376991  | (A+L) |

|                          | Total            | Coulomb          |   |
|--------------------------|------------------|------------------|---|
| Exchange+Corr.           |                  |                  |   |
| Total two-electron terms | 1999.70936480337 | 2128.55437394246 | - |
| 128.84500913909          |                  |                  |   |
| Hamiltonian 1.....       | 1025.08196151037 | 1070.94828939001 | - |
| 45.86632787964           |                  |                  |   |
| Hamiltonian 2.....       | 1012.09892961138 | 1057.60608455245 | - |
| 45.50715494107           |                  |                  |   |

SCFE: SCF energy: RODFT -882.24807376991 hartrees iterations: 9

HOMO energy: -0.23019  
LUMO energy: -0.17095

Orbital energies:

|           |           |           |           |           |           |
|-----------|-----------|-----------|-----------|-----------|-----------|
| -14.53616 | -14.53544 | -10.37257 | -10.37209 | -10.36724 | -10.36702 |
| -10.35730 | -10.35709 | -10.32712 | -10.32702 | -10.32428 | -10.32396 |
| -10.32233 | -10.32226 | -10.31725 | -10.31718 | -10.31253 | -10.31231 |
| -10.31091 | -10.31075 | -10.29257 | -10.29200 | -1.12982  | -1.12898  |
| -0.98234  | -0.95873  | -0.95669  | -0.92664  | -0.91595  | -0.90013  |
| -0.88761  | -0.85009  | -0.84659  | -0.79434  | -0.78378  | -0.77841  |
| -0.76080  | -0.74981  | -0.74870  | -0.69709  | -0.67493  | -0.66557  |

|          |          |          |          |          |          |
|----------|----------|----------|----------|----------|----------|
| -0.64761 | -0.63232 | -0.62494 | -0.61906 | -0.61332 | -0.59923 |
| -0.59842 | -0.59742 | -0.57877 | -0.57185 | -0.56539 | -0.55256 |
| -0.54725 | -0.54623 | -0.53900 | -0.52442 | -0.51153 | -0.51079 |
| -0.50431 | -0.49988 | -0.49457 | -0.49309 | -0.48216 | -0.47882 |
| -0.46131 | -0.44820 | -0.44099 | -0.42100 | -0.41522 | -0.40774 |
| -0.40022 | -0.34502 | -0.34357 | -0.23019 | -0.17095 | -0.16241 |
| -0.13787 | -0.10629 | -0.08840 | -0.03266 | -0.02799 | -0.01774 |
| -0.01435 | -0.00424 |          |          |          |          |

end of program scf

|                   |       |         |           |         |
|-------------------|-------|---------|-----------|---------|
| Total cpu seconds | user: | 795.233 | user+sys: | 795.233 |
|-------------------|-------|---------|-----------|---------|

5. SCF calculations, compound 2

```
+-----+  
| Jaguar version 3.5, release 42 |  
| | |  
| Copyright 1991-1998 Schrodinger, Inc. |  
| All Rights Reserved. |  
| | |  
| Use of this program should be acknowledged in publications as: |  
| Jaguar 3.5, Schrodinger, Inc., Portland, Oregon, 1998. |  
+-----+
```

start of program pre

Job name: WF15023

Executables used: C:\PROGRA~1\WAVEFU~1\TITAN

Temporary files : C:\DOCUME~1\pospisil\LOCALS~1\Temp\WF15023

Input file comments:

Molecule001

This file created by Spartan

basis set: 6-31g\*

net molecular charge: 2

multiplicity: 1

number of basis functions.... 404

Input geometry:

|      | angstroms     |               |               |
|------|---------------|---------------|---------------|
| atom | x             | y             | z             |
| H1   | 4.6848200000  | 0.3873470000  | -1.3741740000 |
| C1   | 3.6883410000  | -0.0416040000 | -1.4466530000 |
| C2   | 1.1725580000  | -1.1264510000 | -1.5329800000 |
| N2   | 2.8391790000  | 0.1476970000  | -0.4073450000 |
| C4   | 3.3062640000  | -0.7742250000 | -2.5598430000 |
| C5   | 2.0425050000  | -1.3368920000 | -2.5974950000 |
| C6   | 1.5581420000  | -0.3277170000 | -0.4394890000 |
| H3   | 4.0031140000  | -0.9297220000 | -3.3816840000 |
| H4   | 1.7432510000  | -1.9506670000 | -3.4475410000 |
| C3   | 3.3458170000  | 0.8467880000  | 0.7944470000  |
| H7   | 2.9613770000  | 1.8724780000  | 0.7481240000  |
| H8   | 4.4403590000  | 0.8739460000  | 0.7634740000  |
| C7   | 2.8743890000  | 0.0888850000  | 2.0252360000  |
| H11  | 3.2385750000  | 0.6365330000  | 2.9005790000  |
| H12  | 3.2895700000  | -0.9254220000 | 2.0452260000  |
| C9   | 0.7015330000  | -0.0589700000 | 0.7549730000  |
| C10  | -0.7241400000 | 0.0596040000  | 0.7237680000  |
| C8   | 1.3582650000  | -0.0011880000 | 2.0202000000  |

|     |               |               |               |
|-----|---------------|---------------|---------------|
| C11 | -1.4365730000 | -0.0101310000 | 1.9578720000  |
| C12 | -0.7710760000 | 0.0084600000  | 3.2071590000  |
| C13 | 0.6377790000  | -0.0315760000 | 3.2383660000  |
| C14 | -2.9513960000 | -0.0999320000 | 1.8944980000  |
| H9  | -3.3672760000 | 0.9142240000  | 1.9056660000  |
| H10 | -3.3540980000 | -0.6558450000 | 2.7474740000  |
| C15 | -3.3673590000 | -0.8459380000 | 0.6367420000  |
| H13 | -4.4594280000 | -0.8725720000 | 0.5567800000  |
| H17 | -2.9810120000 | -1.8712180000 | 0.5977900000  |
| C16 | -1.5267450000 | 0.3399390000  | -0.5050450000 |
| N1  | -2.8078370000 | -0.1354970000 | -0.5345490000 |
| C18 | -3.6098960000 | 0.0639080000  | -1.6087980000 |
| H18 | -4.6085200000 | -0.3655120000 | -1.5848890000 |
| C19 | -3.1787670000 | 0.8070600000  | -2.6968060000 |
| H20 | -3.8383460000 | 0.9705490000  | -3.5473530000 |
| C20 | -1.0930040000 | 1.1490130000  | -1.5725840000 |
| C21 | -1.9147100000 | 1.3698010000  | -2.6727380000 |
| H22 | -1.5780190000 | 1.9916150000  | -3.5027010000 |
| C17 | -1.5598780000 | 0.0497780000  | 4.5015180000  |
| H14 | -1.0327780000 | 0.6165060000  | 5.2756770000  |
| H15 | -1.7472750000 | -0.9667750000 | 4.8606790000  |
| H19 | -2.5148140000 | 0.5702640000  | 4.3797240000  |
| C22 | 1.3681450000  | -0.0854320000 | 4.5661250000  |
| H5  | 2.3276640000  | -0.6049420000 | 4.4820250000  |
| H23 | 0.8071970000  | -0.6594140000 | 5.3105850000  |
| H24 | 1.5391460000  | 0.9276020000  | 4.9429740000  |
| H2  | 0.2033400000  | -1.6186100000 | -1.5624630000 |
| H16 | -0.1235440000 | 1.6412320000  | -1.5541510000 |

Molecular weight: 314.18 amu

Stoichiometry: C22N2H22

Molecular Point Group: C2

Point Group used: C1 (symmetry turned off)

nuclear repulsion energy..... 2027.393825764 hartrees

Non-default options chosen:

SCF calculation type: DFT

DFT=Becke\_3\_Parameter/HF+Slater+Becke88+VWN+LYP (B3LYP)

Molecular symmetry not used

end of program pre

start of program onee

smallest eigenvalue of S: 2.526E-04

number of canonical orbitals.....

403

end of program onee

start of program hfig

initial wavefunction generated automatically from atomic wavefunctions

| Irreducible representation | Total no orbitals | No of occupied orbitals |         |     |
|----------------------------|-------------------|-------------------------|---------|-----|
| No Symm                    | 403               | Shell_1                 | Shell_2 | ... |
| -----                      |                   |                         |         |     |
| Orbital occupation/shell   |                   | 1.000                   |         |     |

end of program hfig

start of program probe

end of program probe

start of program grid

number of gridpoints:

| atom     | H1   | C1   | C2   | N2   | C4   | C5   | C6   | H3   |
|----------|------|------|------|------|------|------|------|------|
| grid # 1 | 72   | 85   | 86   | 96   | 89   | 89   | 86   | 73   |
| grid # 2 | 115  | 94   | 96   | 104  | 97   | 96   | 95   | 118  |
| grid # 3 | 216  | 178  | 183  | 215  | 183  | 183  | 190  | 224  |
| grid # 4 | 223  | 314  | 329  | 382  | 331  | 329  | 330  | 232  |
| grid # 5 | 4304 | 4304 | 4304 | 4304 | 4304 | 4304 | 4304 | 4304 |
| grid # 6 | 1192 | 1192 | 1192 | 1192 | 1192 | 1192 | 1192 | 1192 |
| grid # 7 | 5226 | 5226 | 5226 | 5226 | 5226 | 5226 | 5226 | 5226 |

number of gridpoints:

| atom     | H4   | C3   | H7   | H8   | C7   | H11  | H12  | C9   |
|----------|------|------|------|------|------|------|------|------|
| grid # 1 | 73   | 83   | 70   | 68   | 84   | 68   | 69   | 93   |
| grid # 2 | 118  | 91   | 111  | 107  | 92   | 107  | 110  | 101  |
| grid # 3 | 222  | 166  | 220  | 214  | 164  | 208  | 218  | 199  |
| grid # 4 | 231  | 288  | 225  | 219  | 298  | 213  | 223  | 346  |
| grid # 5 | 4304 | 4304 | 4304 | 4304 | 4304 | 4304 | 4304 | 4304 |
| grid # 6 | 1192 | 1192 | 1192 | 1192 | 1192 | 1192 | 1192 | 1192 |
| grid # 7 | 5226 | 5226 | 5226 | 5226 | 5226 | 5226 | 5226 | 5226 |

number of gridpoints:

| atom     | C10 | C8  | C11 | C12 | C13 | C14 | H9  | H10 |
|----------|-----|-----|-----|-----|-----|-----|-----|-----|
| grid # 1 | 93  | 90  | 90  | 93  | 93  | 84  | 69  | 68  |
| grid # 2 | 101 | 98  | 98  | 101 | 101 | 92  | 110 | 107 |
| grid # 3 | 199 | 196 | 196 | 195 | 195 | 164 | 218 | 208 |
| grid # 4 | 346 | 345 | 345 | 348 | 348 | 298 | 223 | 213 |

|          |      |      |      |      |      |      |      |      |
|----------|------|------|------|------|------|------|------|------|
| grid # 5 | 4304 | 4304 | 4304 | 4304 | 4304 | 4304 | 4304 | 4304 |
| grid # 6 | 1192 | 1192 | 1192 | 1192 | 1192 | 1192 | 1192 | 1192 |
| grid # 7 | 5226 | 5226 | 5226 | 5226 | 5226 | 5226 | 5226 | 5226 |

number of gridpoints:

| atom     | C15  | H13  | H17  | C16  | N1   | C18  | H18  | C19  |
|----------|------|------|------|------|------|------|------|------|
| grid # 1 | 83   | 68   | 70   | 86   | 96   | 85   | 72   | 89   |
| grid # 2 | 91   | 107  | 111  | 95   | 104  | 94   | 115  | 97   |
| grid # 3 | 166  | 214  | 220  | 190  | 215  | 178  | 216  | 183  |
| grid # 4 | 288  | 219  | 225  | 330  | 382  | 314  | 223  | 331  |
| grid # 5 | 4304 | 4304 | 4304 | 4304 | 4304 | 4304 | 4304 | 4304 |
| grid # 6 | 1192 | 1192 | 1192 | 1192 | 1192 | 1192 | 1192 | 1192 |
| grid # 7 | 5226 | 5226 | 5226 | 5226 | 5226 | 5226 | 5226 | 5226 |

number of gridpoints:

| atom     | H20  | C20  | C21  | H22  | C17  | H14  | H15  | H19  |
|----------|------|------|------|------|------|------|------|------|
| grid # 1 | 73   | 86   | 89   | 73   | 74   | 69   | 72   | 69   |
| grid # 2 | 118  | 96   | 96   | 118  | 82   | 107  | 111  | 107  |
| grid # 3 | 224  | 183  | 183  | 222  | 152  | 210  | 216  | 210  |
| grid # 4 | 232  | 329  | 329  | 231  | 291  | 215  | 222  | 215  |
| grid # 5 | 4304 | 4304 | 4304 | 4304 | 4304 | 4304 | 4304 | 4304 |
| grid # 6 | 1192 | 1192 | 1192 | 1192 | 1192 | 1192 | 1192 | 1192 |
| grid # 7 | 5226 | 5226 | 5226 | 5226 | 5226 | 5226 | 5226 | 5226 |

number of gridpoints:

| atom     | C22  | H5   | H23  | H24  | H2   | H16  | total  |
|----------|------|------|------|------|------|------|--------|
| grid # 1 | 74   | 69   | 69   | 72   | 71   | 71   | 3644   |
| grid # 2 | 82   | 107  | 107  | 111  | 114  | 114  | 4744   |
| grid # 3 | 152  | 210  | 210  | 216  | 217  | 217  | 9158   |
| grid # 4 | 291  | 215  | 215  | 222  | 223  | 223  | 12744  |
| grid # 5 | 4304 | 4304 | 4304 | 4304 | 4304 | 4304 | 197984 |
| grid # 6 | 1192 | 1192 | 1192 | 1192 | 1192 | 1192 | 54832  |
| grid # 7 | 5226 | 5226 | 5226 | 5226 | 5226 | 5226 | 240396 |

end of program grid

start of program rwr

end of program rwr

start of program scf

|                               |     |
|-------------------------------|-----|
| number of electrons.....      | 166 |
| number of alpha electrons.... | 83  |
| number of beta electrons..... | 83  |
| number of orbitals, total.... | 403 |
| number of core orbitals.....  | 83  |

```

number of open shell orbs....      0
number of occupied orbitals..      83
number of virtual orbitals...     320
number of hamiltonians.....       1
number of shells.....             1
SCF type: DFT=Becke_3_Parameter/HF+Slater+Becke88+VWN+LYP (B3LYP)

```

|      | i | u | d | i | g |                  | RMS      | maximum |
|------|---|---|---|---|---|------------------|----------|---------|
|      | t | p | i | c | r |                  | energy   | DIIS    |
|      | e | d | i | u | i | total energy     | density  | error   |
|      | r | t | s | t | d | change           | change   |         |
| etot | 1 | N | N | 5 | M | -956.90991687703 | 5.0E-03  | 1.2E-01 |
| etot | 2 | Y | Y | 6 | M | -959.99909218579 | 3.1E+00  | 6.1E-02 |
| etot | 3 | Y | Y | 6 | M | -960.23619181897 | 2.4E-01  | 5.3E-02 |
| etot | 4 | N | Y | 2 | U | -960.54855721605 | 3.1E-01  | 2.6E-02 |
| etot | 5 | Y | Y | 6 | M | -960.58682580195 | 3.8E-02  | 1.4E-02 |
| etot | 6 | N | Y | 2 | U | -960.59849296698 | 1.2E-02  | 4.0E-03 |
| etot | 7 | Y | Y | 6 | M | -960.60114922319 | 2.7E-03  | 1.4E-03 |
| etot | 8 | Y | Y | 6 | M | -960.60140808225 | 2.6E-04  | 4.1E-04 |
| etot | 9 | N | N | 2 | U | -960.60136842640 | -4.0E-05 | 0.0E+00 |

Energy components, in hartrees:

|     |                               |                   |       |
|-----|-------------------------------|-------------------|-------|
| (A) | Nuclear repulsion.....        | 2027.39382576376  |       |
| (E) | Total one-electron terms..... | -5284.39289576641 |       |
| (I) | Total two-electron terms..... | 2296.39770157625  |       |
| (J) | Coulomb.....                  | 2437.26101687410  |       |
| (K) | Exchange+Correlation.....     | -140.86331529784  |       |
| (L) | Electronic energy.....        | -2987.99519419016 | (E+I) |
| (N) | Total energy.....             | -960.60136842640  | (A+L) |

SCFE: SCF energy: DFT -960.60136842640 hartrees iterations: 9

HOMO energy: -0.46721  
LUMO energy: -0.32746

Orbital energies:

|           |           |           |           |           |           |
|-----------|-----------|-----------|-----------|-----------|-----------|
| -14.68890 | -14.68890 | -10.52528 | -10.52527 | -10.50505 | -10.50504 |
| -10.48037 | -10.48037 | -10.46697 | -10.46697 | -10.46669 | -10.46669 |
| -10.46374 | -10.46333 | -10.45591 | -10.45590 | -10.44596 | -10.44596 |
| -10.43462 | -10.43414 | -10.43187 | -10.43186 | -10.38703 | -10.38702 |
| -1.27496  | -1.27401  | -1.11710  | -1.09592  | -1.09540  | -1.06469  |
| -1.05850  | -1.03491  | -1.01870  | -1.00094  | -0.98368  | -0.93905  |
| -0.92743  | -0.91606  | -0.91219  | -0.91016  | -0.88502  | -0.87954  |
| -0.86245  | -0.80702  | -0.80130  | -0.78900  | -0.77863  | -0.76580  |

|                   |          |          |          |           |          |
|-------------------|----------|----------|----------|-----------|----------|
| -0.76321          | -0.74884 | -0.74377 | -0.73378 | -0.72738  | -0.72477 |
| -0.71323          | -0.71129 | -0.69283 | -0.69012 | -0.67531  | -0.67002 |
| -0.65771          | -0.64820 | -0.64197 | -0.64166 | -0.63145  | -0.63138 |
| -0.62955          | -0.62515 | -0.61856 | -0.61170 | -0.60735  | -0.60371 |
| -0.60183          | -0.58559 | -0.57449 | -0.56331 | -0.56041  | -0.55672 |
| -0.55036          | -0.54265 | -0.52186 | -0.46851 | -0.46721  | -0.32746 |
| -0.30396          | -0.29681 | -0.27413 | -0.23946 | -0.21994  | -0.15608 |
| -0.14859          | -0.14257 | -0.13264 |          |           |          |
| Total cpu seconds |          | user:    | 314.203  | user+sys: | 314.203  |



## 6. SCF calculations, compound 4

```
+-----+
| Jaguar version 3.5, release 42                                     |
|                                                                 |
| Copyright 1991-1998 Schrodinger, Inc.                           |
| All Rights Reserved.                                           |
|                                                                 |
| Use of this program should be acknowledged in publications as: |
| Jaguar 3.5, Schrodinger, Inc., Portland, Oregon, 1998.       |
+-----+
```

start of program pre  
Job name: WF12835  
Executables used: C:\PROGRA~1\WAVEFU~1\TITAN  
Temporary files : C:\DOCUME~1\pospasil\LOCALS~1\Temp\WF12835

Input file comments:  
Molecule001  
This file created by Spartan

basis set: 6-31g\*  
net molecular charge: 2  
multiplicity: 1

number of basis functions.... 442

Input geometry:

|      | angstroms     |               |               |
|------|---------------|---------------|---------------|
| atom | x             | y             | z             |
| H1   | 4.6458310000  | 0.2076260000  | -1.3518190000 |
| C1   | 3.6541270000  | -0.2324940000 | -1.4245390000 |
| C2   | 1.1525690000  | -1.3931760000 | -1.4789870000 |
| N2   | 2.8108910000  | -0.0690500000 | -0.3783190000 |
| C4   | 3.2771060000  | -0.9511760000 | -2.5418620000 |
| C5   | 2.0324940000  | -1.5536030000 | -2.5584010000 |
| C6   | 1.5223250000  | -0.5404210000 | -0.4069670000 |
| H3   | 3.9667970000  | -1.0842740000 | -3.3731160000 |
| H4   | 1.7610690000  | -2.1803310000 | -3.4102490000 |
| C3   | 3.3475860000  | 0.5729740000  | 0.8465030000  |
| H7   | 3.0124640000  | 1.6166370000  | 0.8288950000  |
| H8   | 4.4424340000  | 0.5458180000  | 0.8168940000  |
| C7   | 2.8390450000  | -0.1999760000 | 2.0554110000  |
| H11  | 3.2495380000  | 0.2840200000  | 2.9465330000  |
| H12  | 3.1738270000  | -1.2432920000 | 2.0329630000  |
| C9   | 0.6800820000  | -0.1636790000 | 0.7733270000  |
| C10  | -0.7060810000 | 0.1659940000  | 0.7225620000  |
| C8   | 1.3221410000  | -0.1621300000 | 2.0486600000  |

|     |               |               |               |
|-----|---------------|---------------|---------------|
| C11 | -1.4378470000 | 0.1724360000  | 1.9486090000  |
| C12 | -0.7987640000 | 0.1107910000  | 3.2104070000  |
| C13 | 0.5943260000  | -0.0925840000 | 3.2610170000  |
| C14 | -2.9513290000 | 0.2099770000  | 1.8464400000  |
| H9  | -3.2834050000 | 1.2530520000  | 1.7934110000  |
| H10 | -3.4247120000 | -0.2684180000 | 2.7089360000  |
| C15 | -3.3721420000 | -0.5707870000 | 0.6091640000  |
| H13 | -4.4620500000 | -0.5440710000 | 0.5010300000  |
| H17 | -3.0368580000 | -1.6144640000 | 0.6222660000  |
| C16 | -1.4615240000 | 0.5350060000  | -0.5174130000 |
| N1  | -2.7489400000 | 0.0635330000  | -0.5781370000 |
| C18 | -3.5150270000 | 0.2201060000  | -1.6830950000 |
| H18 | -4.5094940000 | -0.2197680000 | -1.6787950000 |
| C19 | -3.0587730000 | 0.9317300000  | -2.7751020000 |
| H20 | -3.6871150000 | 1.0593650000  | -3.6544580000 |
| C20 | -1.0157300000 | 1.3809880000  | -1.5656110000 |
| C21 | -1.8160360000 | 1.5343250000  | -2.7062860000 |
| H22 | -1.4841430000 | 2.1556680000  | -3.5404830000 |
| C17 | -1.5988170000 | 0.2387830000  | 4.4930480000  |
| H14 | -1.0244170000 | 0.7448290000  | 5.2755500000  |
| H15 | -1.9002530000 | -0.7508720000 | 4.8495840000  |
| H19 | -2.4908680000 | 0.8590530000  | 4.3591620000  |
| C22 | 1.3004140000  | -0.2122070000 | 4.5984650000  |
| H5  | 2.1996220000  | -0.8331140000 | 4.5327840000  |
| H23 | 0.6713210000  | -0.7133810000 | 5.3410220000  |
| H24 | 1.5757620000  | 0.7797720000  | 4.9693560000  |
| C23 | -0.1182960000 | -2.1992420000 | -1.5325470000 |
| H16 | 0.0923450000  | -3.2104380000 | -1.9014610000 |
| H25 | -0.8377940000 | -1.7352050000 | -2.2134460000 |
| H26 | -0.5695990000 | -2.3260210000 | -0.5452960000 |
| C24 | 0.2558910000  | 2.1869880000  | -1.5331370000 |
| H6  | 1.0222100000  | 1.7187800000  | -2.1577720000 |
| H27 | 0.6353430000  | 2.3201660000  | -0.5169230000 |
| H28 | 0.0724500000  | 3.1957610000  | -1.9226370000 |

Molecular weight: 342.21 amu

Stoichiometry: C24N2H26

Molecular Point Group: C2

Point Group used: C1 (symmetry turned off)

nuclear repulsion energy..... 2399.092349529 hartrees

Non-default options chosen:

SCF calculation type: DFT

DFT=Becke\_3\_Parameter/HF+Slater+Becke88+VWN+LYP (B3LYP)

Molecular symmetry not used

end of program pre

start of program onee

smallest eigenvalue of S: 2.550E-04

number of canonical orbitals..... 441

end of program onee

start of program hfig

initial wavefunction generated automatically from atomic wavefunctions

| Irreducible representation | Total no orbitals | No of occupied orbitals |         |     |
|----------------------------|-------------------|-------------------------|---------|-----|
| No Symm                    | 441               | Shell_1                 | Shell_2 | ... |
| -----                      |                   | 91                      |         |     |

Orbital occupation/shell 1.000

end of program hfig

start of program probe

end of program probe

start of program grid

number of gridpoints:

| atom     | H1   | C1   | C2   | N2   | C4   | C5   | C6   | H3   |
|----------|------|------|------|------|------|------|------|------|
| grid # 1 | 72   | 84   | 89   | 96   | 88   | 88   | 87   | 73   |
| grid # 2 | 114  | 93   | 101  | 104  | 96   | 96   | 96   | 118  |
| grid # 3 | 217  | 178  | 195  | 214  | 182  | 185  | 191  | 222  |
| grid # 4 | 223  | 312  | 343  | 381  | 331  | 330  | 330  | 231  |
| grid # 5 | 4304 | 4304 | 4304 | 4304 | 4304 | 4304 | 4304 | 4304 |
| grid # 6 | 1192 | 1192 | 1192 | 1192 | 1192 | 1192 | 1192 | 1192 |
| grid # 7 | 5226 | 5226 | 5226 | 5226 | 5226 | 5226 | 5226 | 5226 |

number of gridpoints:

| atom     | H4   | C3   | H7   | H8   | C7   | H11  | H12  | C9   |
|----------|------|------|------|------|------|------|------|------|
| grid # 1 | 72   | 83   | 70   | 68   | 84   | 68   | 69   | 88   |
| grid # 2 | 116  | 91   | 109  | 107  | 92   | 106  | 111  | 98   |
| grid # 3 | 217  | 166  | 216  | 214  | 164  | 209  | 220  | 196  |
| grid # 4 | 224  | 288  | 219  | 219  | 298  | 213  | 224  | 343  |
| grid # 5 | 4304 | 4304 | 4304 | 4304 | 4304 | 4304 | 4304 | 4304 |
| grid # 6 | 1192 | 1192 | 1192 | 1192 | 1192 | 1192 | 1192 | 1192 |
| grid # 7 | 5226 | 5226 | 5226 | 5226 | 5226 | 5226 | 5226 | 5226 |

number of gridpoints:

| atom     | C10  | C8   | C11  | C12  | C13  | C14  | H9   | H10  |
|----------|------|------|------|------|------|------|------|------|
| grid # 1 | 88   | 89   | 89   | 92   | 92   | 84   | 69   | 68   |
| grid # 2 | 98   | 98   | 98   | 101  | 101  | 92   | 111  | 106  |
| grid # 3 | 196  | 196  | 196  | 195  | 195  | 164  | 220  | 209  |
| grid # 4 | 343  | 343  | 343  | 347  | 347  | 298  | 224  | 213  |
| grid # 5 | 4304 | 4304 | 4304 | 4304 | 4304 | 4304 | 4304 | 4304 |
| grid # 6 | 1192 | 1192 | 1192 | 1192 | 1192 | 1192 | 1192 | 1192 |
| grid # 7 | 5226 | 5226 | 5226 | 5226 | 5226 | 5226 | 5226 | 5226 |

number of gridpoints:

| atom     | C15  | H13  | H17  | C16  | N1   | C18  | H18  | C19  |
|----------|------|------|------|------|------|------|------|------|
| grid # 1 | 83   | 68   | 70   | 87   | 96   | 84   | 72   | 88   |
| grid # 2 | 91   | 107  | 109  | 96   | 104  | 93   | 114  | 96   |
| grid # 3 | 166  | 214  | 216  | 191  | 214  | 178  | 217  | 182  |
| grid # 4 | 288  | 219  | 219  | 330  | 381  | 312  | 223  | 331  |
| grid # 5 | 4304 | 4304 | 4304 | 4304 | 4304 | 4304 | 4304 | 4304 |
| grid # 6 | 1192 | 1192 | 1192 | 1192 | 1192 | 1192 | 1192 | 1192 |
| grid # 7 | 5226 | 5226 | 5226 | 5226 | 5226 | 5226 | 5226 | 5226 |

number of gridpoints:

| atom     | H20  | C20  | C21  | H22  | C17  | H14  | H15  | H19  |
|----------|------|------|------|------|------|------|------|------|
| grid # 1 | 73   | 89   | 88   | 72   | 74   | 69   | 72   | 69   |
| grid # 2 | 118  | 101  | 96   | 116  | 82   | 107  | 111  | 108  |
| grid # 3 | 222  | 195  | 185  | 217  | 152  | 210  | 216  | 211  |
| grid # 4 | 231  | 343  | 330  | 224  | 291  | 215  | 222  | 215  |
| grid # 5 | 4304 | 4304 | 4304 | 4304 | 4304 | 4304 | 4304 | 4304 |
| grid # 6 | 1192 | 1192 | 1192 | 1192 | 1192 | 1192 | 1192 | 1192 |
| grid # 7 | 5226 | 5226 | 5226 | 5226 | 5226 | 5226 | 5226 | 5226 |

number of gridpoints:

| atom     | C22  | H5   | H23  | H24  | C23  | H16  | H25  | H26  |
|----------|------|------|------|------|------|------|------|------|
| grid # 1 | 74   | 69   | 69   | 72   | 72   | 71   | 71   | 69   |
| grid # 2 | 82   | 108  | 107  | 111  | 79   | 109  | 107  | 106  |
| grid # 3 | 152  | 211  | 210  | 216  | 153  | 217  | 216  | 214  |
| grid # 4 | 291  | 215  | 215  | 222  | 294  | 223  | 217  | 215  |
| grid # 5 | 4304 | 4304 | 4304 | 4304 | 4304 | 4304 | 4304 | 4304 |
| grid # 6 | 1192 | 1192 | 1192 | 1192 | 1192 | 1192 | 1192 | 1192 |
| grid # 7 | 5226 | 5226 | 5226 | 5226 | 5226 | 5226 | 5226 | 5226 |

number of gridpoints:

| atom     | C24  | H6   | H27  | H28  | total  |
|----------|------|------|------|------|--------|
| grid # 1 | 72   | 71   | 69   | 71   | 4054   |
| grid # 2 | 79   | 107  | 106  | 109  | 5312   |
| grid # 3 | 153  | 216  | 214  | 217  | 10332  |
| grid # 4 | 294  | 217  | 215  | 223  | 14182  |
| grid # 5 | 4304 | 4304 | 4304 | 4304 | 223808 |

```
grid # 6      1192   1192   1192   1192   61984
grid # 7      5226   5226   5226   5226  271752
```

end of program grid

```
start of program rwr
end of program rwr
```

```
start of program scf
number of electrons.....          182
number of alpha electrons....       91
number of beta electrons.....       91
number of orbitals, total....      441
number of core orbitals.....        91
number of open shell orbs....        0
number of occupied orbitals..       91
number of virtual orbitals...      350
number of hamiltonians.....         1
number of shells.....              1
SCF type: DFT=Becke_3_Parameter/HF+Slater+Becke88+VWN+LYP (B3LYP)
```

|      | i | u | d | i | g |                   |         | RMS     | maximum |
|------|---|---|---|---|---|-------------------|---------|---------|---------|
|      | t | p | i | c | r |                   | energy  | density | DIIS    |
|      | r | t | s | t | d | total energy      | change  | change  | error   |
| etot | 1 | N | N | 5 | M | -1035.24846968973 |         | 5.0E-03 | 1.2E-01 |
| etot | 2 | Y | Y | 6 | M | -1038.58371757239 | 3.3E+00 | 4.4E-03 | 7.6E-02 |
| etot | 3 | Y | Y | 6 | M | -1038.81555929801 | 2.3E-01 | 1.9E-03 | 6.4E-02 |
| etot | 4 | N | Y | 2 | U | -1039.15303731354 | 3.4E-01 | 2.5E-03 | 2.0E-02 |
| etot | 5 | Y | Y | 6 | M | -1039.20366631816 | 5.1E-02 | 2.4E-03 | 1.2E-02 |
| etot | 6 | N | Y | 2 | U | -1039.22167917991 | 1.8E-02 | 3.9E-04 | 6.4E-03 |
| etot | 7 | Y | Y | 6 | M | -1039.22764870434 | 6.0E-03 | 1.1E-04 | 1.3E-03 |
| etot | 8 | N | Y | 2 | U | -1039.22789566679 | 2.5E-04 | 5.7E-05 | 6.0E-04 |
| etot | 9 | Y | N | 6 | M | -1039.22792005479 | 2.4E-05 | 0.0E+00 | 0.0E+00 |

Energy components, in hartrees:

```
(A) Nuclear repulsion.....          2399.09234952942
(E) Total one-electron terms..... -6128.37546053362
(I) Total two-electron terms.....  2690.05519094941
(J)   Coulomb.....                2843.28448137341
(K)   Exchange+Correlation.....   -153.22929042400
(L) Electronic energy.....        -3438.32026958421 (E+I)
(N) Total energy.....            -1039.22792005479 (A+L)
```

SCFE: SCF energy: DFT -1039.22792005479 hartrees iterations: 9

HOMO energy: -0.46116

LUMO energy: -0.32244

Orbital energies:

|           |           |           |           |           |           |
|-----------|-----------|-----------|-----------|-----------|-----------|
| -14.68368 | -14.68368 | -10.51815 | -10.51815 | -10.49771 | -10.49771 |
| -10.47713 | -10.47713 | -10.47187 | -10.47187 | -10.45914 | -10.45913 |
| -10.45825 | -10.45783 | -10.45022 | -10.45021 | -10.43960 | -10.43960 |
| -10.42848 | -10.42799 | -10.42751 | -10.42751 | -10.41971 | -10.41971 |
| -10.38302 | -10.38302 | -1.26831  | -1.26728  | -1.11248  | -1.09580  |
| -1.09422  | -1.06496  | -1.05442  | -1.03021  | -1.01734  | -1.00229  |
| -0.99023  | -0.95714  | -0.95657  | -0.92369  | -0.91674  | -0.90745  |
| -0.88859  | -0.87860  | -0.87641  | -0.86218  | -0.85865  | -0.80141  |
| -0.79077  | -0.78127  | -0.76919  | -0.76189  | -0.76122  | -0.74839  |
| -0.73931  | -0.72167  | -0.71996  | -0.71698  | -0.69782  | -0.69111  |
| -0.68469  | -0.68254  | -0.67252  | -0.66977  | -0.65687  | -0.65509  |
| -0.65124  | -0.64615  | -0.63585  | -0.63548  | -0.63027  | -0.62474  |
| -0.62311  | -0.61585  | -0.61290  | -0.60794  | -0.60708  | -0.60388  |
| -0.60033  | -0.59952  | -0.59721  | -0.57660  | -0.56973  | -0.55821  |
| -0.55423  | -0.54555  | -0.53998  | -0.52216  | -0.51357  | -0.46335  |
| -0.46116  | -0.32244  | -0.30116  | -0.28665  | -0.26975  | -0.23790  |
| -0.21942  | -0.14535  | -0.14374  | -0.14310  | -0.14068  |           |

Total cpu seconds user: 409.734 user+sys: 409.734

7. SFC calculations compound 5

```
+-----+  
| Jaguar version 3.5, release 42 |  
| | |  
| Copyright 1991-1998 Schrodinger, Inc. |  
| All Rights Reserved. |  
| | |  
| Use of this program should be acknowledged in publications as: |  
| Jaguar 3.5, Schrodinger, Inc., Portland, Oregon, 1998. |  
+-----+
```

start of program pre  
Job name: WF12835  
Executables used: C:\PROGRA~1\WAVEFU~1\TITAN  
Temporary files : C:\DOCUME~1\pospasil\LOCALS~1\Temp\WF12835

Input file comments:  
Molecule001  
This file created by Spartan

basis set: 6-31g\*  
net molecular charge: 2  
multiplicity: 1

number of basis functions.... 442

Input geometry:

|      | angstroms     |               |               |
|------|---------------|---------------|---------------|
| atom | x             | y             | z             |
| H1   | 4.6458310000  | 0.2076260000  | -1.3518190000 |
| C1   | 3.6541270000  | -0.2324940000 | -1.4245390000 |
| C2   | 1.1525690000  | -1.3931760000 | -1.4789870000 |
| N2   | 2.8108910000  | -0.0690500000 | -0.3783190000 |
| C4   | 3.2771060000  | -0.9511760000 | -2.5418620000 |
| C5   | 2.0324940000  | -1.5536030000 | -2.5584010000 |
| C6   | 1.5223250000  | -0.5404210000 | -0.4069670000 |
| H3   | 3.9667970000  | -1.0842740000 | -3.3731160000 |
| H4   | 1.7610690000  | -2.1803310000 | -3.4102490000 |
| C3   | 3.3475860000  | 0.5729740000  | 0.8465030000  |
| H7   | 3.0124640000  | 1.6166370000  | 0.8288950000  |
| H8   | 4.4424340000  | 0.5458180000  | 0.8168940000  |
| C7   | 2.8390450000  | -0.1999760000 | 2.0554110000  |
| H11  | 3.2495380000  | 0.2840200000  | 2.9465330000  |
| H12  | 3.1738270000  | -1.2432920000 | 2.0329630000  |
| C9   | 0.6800820000  | -0.1636790000 | 0.7733270000  |
| C10  | -0.7060810000 | 0.1659940000  | 0.7225620000  |

|     |               |               |               |
|-----|---------------|---------------|---------------|
| C8  | 1.3221410000  | -0.1621300000 | 2.0486600000  |
| C11 | -1.4378470000 | 0.1724360000  | 1.9486090000  |
| C12 | -0.7987640000 | 0.1107910000  | 3.2104070000  |
| C13 | 0.5943260000  | -0.0925840000 | 3.2610170000  |
| C14 | -2.9513290000 | 0.2099770000  | 1.8464400000  |
| H9  | -3.2834050000 | 1.2530520000  | 1.7934110000  |
| H10 | -3.4247120000 | -0.2684180000 | 2.7089360000  |
| C15 | -3.3721420000 | -0.5707870000 | 0.6091640000  |
| H13 | -4.4620500000 | -0.5440710000 | 0.5010300000  |
| H17 | -3.0368580000 | -1.6144640000 | 0.6222660000  |
| C16 | -1.4615240000 | 0.5350060000  | -0.5174130000 |
| N1  | -2.7489400000 | 0.0635330000  | -0.5781370000 |
| C18 | -3.5150270000 | 0.2201060000  | -1.6830950000 |
| H18 | -4.5094940000 | -0.2197680000 | -1.6787950000 |
| C19 | -3.0587730000 | 0.9317300000  | -2.7751020000 |
| H20 | -3.6871150000 | 1.0593650000  | -3.6544580000 |
| C20 | -1.0157300000 | 1.3809880000  | -1.5656110000 |
| C21 | -1.8160360000 | 1.5343250000  | -2.7062860000 |
| H22 | -1.4841430000 | 2.1556680000  | -3.5404830000 |
| C17 | -1.5988170000 | 0.2387830000  | 4.4930480000  |
| H14 | -1.0244170000 | 0.7448290000  | 5.2755500000  |
| H15 | -1.9002530000 | -0.7508720000 | 4.8495840000  |
| H19 | -2.4908680000 | 0.8590530000  | 4.3591620000  |
| C22 | 1.3004140000  | -0.2122070000 | 4.5984650000  |
| H5  | 2.1996220000  | -0.8331140000 | 4.5327840000  |
| H23 | 0.6713210000  | -0.7133810000 | 5.3410220000  |
| H24 | 1.5757620000  | 0.7797720000  | 4.9693560000  |
| C23 | -0.1182960000 | -2.1992420000 | -1.5325470000 |
| H16 | 0.0923450000  | -3.2104380000 | -1.9014610000 |
| H25 | -0.8377940000 | -1.7352050000 | -2.2134460000 |
| H26 | -0.5695990000 | -2.3260210000 | -0.5452960000 |
| C24 | 0.2558910000  | 2.1869880000  | -1.5331370000 |
| H6  | 1.0222100000  | 1.7187800000  | -2.1577720000 |
| H27 | 0.6353430000  | 2.3201660000  | -0.5169230000 |
| H28 | 0.0724500000  | 3.1957610000  | -1.9226370000 |

Molecular weight: 342.21 amu

Stoichiometry: C24N2H26

Molecular Point Group: C2

Point Group used: C1 (symmetry turned off)

nuclear repulsion energy..... 2399.092349529 hartrees

Non-default options chosen:

SCF calculation type: DFT

DFT=Becke\_3\_Parameter/HF+Slater+Becke88+VWN+LYP (B3LYP)

Molecular symmetry not used



end of program pre

start of program onee  
smallest eigenvalue of S: 2.550E-04  
number of canonical orbitals..... 441  
end of program onee

start of program hfig  
initial wavefunction generated automatically from atomic wavefunctions

| Irreducible representation | Total no orbitals | No of occupied orbitals |         |     |
|----------------------------|-------------------|-------------------------|---------|-----|
| No Symm                    | 441               | Shell_1                 | Shell_2 | ... |
| -----                      |                   |                         |         |     |
| Orbital occupation/shell   |                   | 1.000                   |         |     |

end of program hfig

start of program probe  
end of program probe

start of program grid

number of gridpoints:

| atom     | H1   | C1   | C2   | N2   | C4   | C5   | C6   | H3   |
|----------|------|------|------|------|------|------|------|------|
| grid # 1 | 72   | 84   | 89   | 96   | 88   | 88   | 87   | 73   |
| grid # 2 | 114  | 93   | 101  | 104  | 96   | 96   | 96   | 118  |
| grid # 3 | 217  | 178  | 195  | 214  | 182  | 185  | 191  | 222  |
| grid # 4 | 223  | 312  | 343  | 381  | 331  | 330  | 330  | 231  |
| grid # 5 | 4304 | 4304 | 4304 | 4304 | 4304 | 4304 | 4304 | 4304 |
| grid # 6 | 1192 | 1192 | 1192 | 1192 | 1192 | 1192 | 1192 | 1192 |
| grid # 7 | 5226 | 5226 | 5226 | 5226 | 5226 | 5226 | 5226 | 5226 |

number of gridpoints:

| atom     | H4   | C3   | H7   | H8   | C7   | H11  | H12  | C9   |
|----------|------|------|------|------|------|------|------|------|
| grid # 1 | 72   | 83   | 70   | 68   | 84   | 68   | 69   | 88   |
| grid # 2 | 116  | 91   | 109  | 107  | 92   | 106  | 111  | 98   |
| grid # 3 | 217  | 166  | 216  | 214  | 164  | 209  | 220  | 196  |
| grid # 4 | 224  | 288  | 219  | 219  | 298  | 213  | 224  | 343  |
| grid # 5 | 4304 | 4304 | 4304 | 4304 | 4304 | 4304 | 4304 | 4304 |
| grid # 6 | 1192 | 1192 | 1192 | 1192 | 1192 | 1192 | 1192 | 1192 |
| grid # 7 | 5226 | 5226 | 5226 | 5226 | 5226 | 5226 | 5226 | 5226 |

number of gridpoints:

| atom     | C10  | C8   | C11  | C12  | C13  | C14  | H9   | H10  |
|----------|------|------|------|------|------|------|------|------|
| grid # 1 | 88   | 89   | 89   | 92   | 92   | 84   | 69   | 68   |
| grid # 2 | 98   | 98   | 98   | 101  | 101  | 92   | 111  | 106  |
| grid # 3 | 196  | 196  | 196  | 195  | 195  | 164  | 220  | 209  |
| grid # 4 | 343  | 343  | 343  | 347  | 347  | 298  | 224  | 213  |
| grid # 5 | 4304 | 4304 | 4304 | 4304 | 4304 | 4304 | 4304 | 4304 |
| grid # 6 | 1192 | 1192 | 1192 | 1192 | 1192 | 1192 | 1192 | 1192 |
| grid # 7 | 5226 | 5226 | 5226 | 5226 | 5226 | 5226 | 5226 | 5226 |

number of gridpoints:

| atom     | C15  | H13  | H17  | C16  | N1   | C18  | H18  | C19  |
|----------|------|------|------|------|------|------|------|------|
| grid # 1 | 83   | 68   | 70   | 87   | 96   | 84   | 72   | 88   |
| grid # 2 | 91   | 107  | 109  | 96   | 104  | 93   | 114  | 96   |
| grid # 3 | 166  | 214  | 216  | 191  | 214  | 178  | 217  | 182  |
| grid # 4 | 288  | 219  | 219  | 330  | 381  | 312  | 223  | 331  |
| grid # 5 | 4304 | 4304 | 4304 | 4304 | 4304 | 4304 | 4304 | 4304 |
| grid # 6 | 1192 | 1192 | 1192 | 1192 | 1192 | 1192 | 1192 | 1192 |
| grid # 7 | 5226 | 5226 | 5226 | 5226 | 5226 | 5226 | 5226 | 5226 |

number of gridpoints:

| atom     | H20  | C20  | C21  | H22  | C17  | H14  | H15  | H19  |
|----------|------|------|------|------|------|------|------|------|
| grid # 1 | 73   | 89   | 88   | 72   | 74   | 69   | 72   | 69   |
| grid # 2 | 118  | 101  | 96   | 116  | 82   | 107  | 111  | 108  |
| grid # 3 | 222  | 195  | 185  | 217  | 152  | 210  | 216  | 211  |
| grid # 4 | 231  | 343  | 330  | 224  | 291  | 215  | 222  | 215  |
| grid # 5 | 4304 | 4304 | 4304 | 4304 | 4304 | 4304 | 4304 | 4304 |
| grid # 6 | 1192 | 1192 | 1192 | 1192 | 1192 | 1192 | 1192 | 1192 |
| grid # 7 | 5226 | 5226 | 5226 | 5226 | 5226 | 5226 | 5226 | 5226 |

number of gridpoints:

| atom     | C22  | H5   | H23  | H24  | C23  | H16  | H25  | H26  |
|----------|------|------|------|------|------|------|------|------|
| grid # 1 | 74   | 69   | 69   | 72   | 72   | 71   | 71   | 69   |
| grid # 2 | 82   | 108  | 107  | 111  | 79   | 109  | 107  | 106  |
| grid # 3 | 152  | 211  | 210  | 216  | 153  | 217  | 216  | 214  |
| grid # 4 | 291  | 215  | 215  | 222  | 294  | 223  | 217  | 215  |
| grid # 5 | 4304 | 4304 | 4304 | 4304 | 4304 | 4304 | 4304 | 4304 |
| grid # 6 | 1192 | 1192 | 1192 | 1192 | 1192 | 1192 | 1192 | 1192 |
| grid # 7 | 5226 | 5226 | 5226 | 5226 | 5226 | 5226 | 5226 | 5226 |

number of gridpoints:

| atom     | C24 | H6  | H27 | H28 | total |
|----------|-----|-----|-----|-----|-------|
| grid # 1 | 72  | 71  | 69  | 71  | 4054  |
| grid # 2 | 79  | 107 | 106 | 109 | 5312  |
| grid # 3 | 153 | 216 | 214 | 217 | 10332 |
| grid # 4 | 294 | 217 | 215 | 223 | 14182 |

```
grid # 5      4304    4304    4304    4304 223808
grid # 6      1192    1192    1192    1192  61984
grid # 7      5226    5226    5226    5226 271752
```

end of program grid

```
start of program rwr
end of program rwr
```

```
start of program scf
number of electrons..... 182
number of alpha electrons.... 91
number of beta electrons..... 91
number of orbitals, total.... 441
number of core orbitals..... 91
number of open shell orbs.... 0
number of occupied orbitals.. 91
number of virtual orbitals... 350
number of hamiltonians..... 1
number of shells..... 1
SCF type: DFT=Becke_3_Parameter/HF+Slater+Becke88+VWN+LYP (B3LYP)
```

|      | i | u | d | i | g |                   | energy  | RMS     | maximum |
|------|---|---|---|---|---|-------------------|---------|---------|---------|
|      | t | p | i | c | r |                   | change  | density | DIIS    |
|      | e | d | i | u | i | total energy      |         | change  | error   |
|      | r | t | s | t | d |                   |         |         |         |
| etot | 1 | N | N | 5 | M | -1035.24846968973 |         | 5.0E-03 | 1.2E-01 |
| etot | 2 | Y | Y | 6 | M | -1038.58371757239 | 3.3E+00 | 4.4E-03 | 7.6E-02 |
| etot | 3 | Y | Y | 6 | M | -1038.81555929801 | 2.3E-01 | 1.9E-03 | 6.4E-02 |
| etot | 4 | N | Y | 2 | U | -1039.15303731354 | 3.4E-01 | 2.5E-03 | 2.0E-02 |
| etot | 5 | Y | Y | 6 | M | -1039.20366631816 | 5.1E-02 | 2.4E-03 | 1.2E-02 |
| etot | 6 | N | Y | 2 | U | -1039.22167917991 | 1.8E-02 | 3.9E-04 | 6.4E-03 |
| etot | 7 | Y | Y | 6 | M | -1039.22764870434 | 6.0E-03 | 1.1E-04 | 1.3E-03 |
| etot | 8 | N | Y | 2 | U | -1039.22789566679 | 2.5E-04 | 5.7E-05 | 6.0E-04 |
| etot | 9 | Y | N | 6 | M | -1039.22792005479 | 2.4E-05 | 0.0E+00 | 0.0E+00 |

Energy components, in hartrees:

```
(A) Nuclear repulsion..... 2399.09234952942
(E) Total one-electron terms..... -6128.37546053362
(I) Total two-electron terms..... 2690.05519094941
(J) Coulomb..... 2843.28448137341
(K) Exchange+Correlation..... -153.22929042400
(L) Electronic energy..... -3438.32026958421 (E+I)
```

(N) Total energy..... -1039.22792005479 (A+L)

SCFE: SCF energy: DFT -1039.22792005479 hartrees iterations: 9

HOMO energy: -0.46116

LUMO energy: -0.32244

Orbital energies:

|           |           |           |           |           |           |
|-----------|-----------|-----------|-----------|-----------|-----------|
| -14.68368 | -14.68368 | -10.51815 | -10.51815 | -10.49771 | -10.49771 |
| -10.47713 | -10.47713 | -10.47187 | -10.47187 | -10.45914 | -10.45913 |
| -10.45825 | -10.45783 | -10.45022 | -10.45021 | -10.43960 | -10.43960 |
| -10.42848 | -10.42799 | -10.42751 | -10.42751 | -10.41971 | -10.41971 |
| -10.38302 | -10.38302 | -1.26831  | -1.26728  | -1.11248  | -1.09580  |
| -1.09422  | -1.06496  | -1.05442  | -1.03021  | -1.01734  | -1.00229  |
| -0.99023  | -0.95714  | -0.95657  | -0.92369  | -0.91674  | -0.90745  |
| -0.88859  | -0.87860  | -0.87641  | -0.86218  | -0.85865  | -0.80141  |
| -0.79077  | -0.78127  | -0.76919  | -0.76189  | -0.76122  | -0.74839  |
| -0.73931  | -0.72167  | -0.71996  | -0.71698  | -0.69782  | -0.69111  |
| -0.68469  | -0.68254  | -0.67252  | -0.66977  | -0.65687  | -0.65509  |
| -0.65124  | -0.64615  | -0.63585  | -0.63548  | -0.63027  | -0.62474  |
| -0.62311  | -0.61585  | -0.61290  | -0.60794  | -0.60708  | -0.60388  |
| -0.60033  | -0.59952  | -0.59721  | -0.57660  | -0.56973  | -0.55821  |
| -0.55423  | -0.54555  | -0.53998  | -0.52216  | -0.51357  | -0.46335  |
| -0.46116  | -0.32244  | -0.30116  | -0.28665  | -0.26975  | -0.23790  |
| -0.21942  | -0.14535  | -0.14374  | -0.14310  | -0.14068  |           |

Total cpu seconds user: 409.734 user+sys: 409.734
